# Supplementary material for: Pinnisterols D–J, New 11-Acetoxy-9,11-secosterols with a 1,4-Quinone Moiety from Formosan Gorgonian Coral Pinnigorgia sp. (Gorgoniidae)
Source: Mar Drugs. 2017 Jan 6;15(1):11. doi: 10.3390/md15010011 (PMC5295231; doi:10.3390/md15010011)
Supplement: Supplementary file 1 [file marinedrugs-15-00011-s001.docx]

Supplementary Materials: **Pinnisterols D–J, New**
**11-**Acetoxy-9,11-secosterols with a 1,4-Quinone Moiety from Formosan Gorgonian Coral
*Pinnigorgia* sp. (Gorgoniidae)

Yu-Chia Chang, Tsong-Long Hwang, Liang-Mou Kuo and Ping-Jyun Sung

| **No.** | **Content** | **Page** |
| --- | --- | --- |
| Figure S1. | HRESIMS spectrum of compound **1**. | S2 |
| Figure S2. | 1H NMR spectrum (400 MHz) of compound **1** in CDCl3. | S2 |
| Figure S3. | 13C NMR spectrum (100 MHz) of compound **1** in CDCl3. | S3 |
| Figure S4. | gHSQC spectrum (400 MHz) of compound **1** in CDCl3. | S3 |
| Figure S5. | 1H–1H COSY spectrum (400 MHz) of compound **1** in CDCl3. | S4 |
| Figure S6. | gHMBC spectrum (400 MHz) of compound **1** in CDCl3. | S4 |
| Figure S7. | NOESY spectrum (400 MHz) of compound **1** in CDCl3. | S5 |
| Figure S8. | HRESIMS spectrum of compound **2**. | S5 |
| Figure S9. | 1H NMR spectrum (400 MHz) of compound **2** in CDCl3. | S6 |
| Figure S10. | 13C NMR spectrum (100 MHz) of compound **2** in CDCl3. | S6 |
| Figure S11. | HRESIMS spectrum of compound **3**. | S7 |
| Figure S12. | 1H NMR spectrum (700 MHz) of compound **3** in CDCl3. | S7 |
| Figure S13. | 13C NMR spectrum (175 MHz) of compound **3** in CDCl3. | S8 |
| Figure S14. | HRESIMS spectrum of compound **4**. | S8 |
| Figure S15. | 1H NMR spectrum (700 MHz) of compound **4** in CDCl3. | S9 |
| Figure S16. | 13C NMR spectrum (175 MHz) of compound **4** in CDCl3. | S9 |
| Figure S17. | HRESIMS spectrum of compound **5**. | S10 |
| Figure S18. | 1H NMR spectrum (400 MHz) of compound **5** in CDCl3. | S10 |
| Figure S19. | 13C NMR spectrum (100 MHz) of compound **5** in CDCl3. | S11 |
| Figure S20. | HRESIMS spectrum of compound **6**. | S11 |
| Figure S21. | 1H NMR spectrum (400 MHz) of compound **6** in CDCl3. | S12 |
| Figure S22. | 13C NMR spectrum (100 MHz) of compound **6** in CDCl3. | S12 |
| Figure S23. | HRESIMS spectrum of compound **7**. | S13 |
| Figure S24. | 1H NMR spectrum (400 MHz) of compound **7** in CDCl3. | S13 |
| Figure S25. | 13C NMR spectrum (100 MHz) of compound **7** in CDCl3. | S14 |


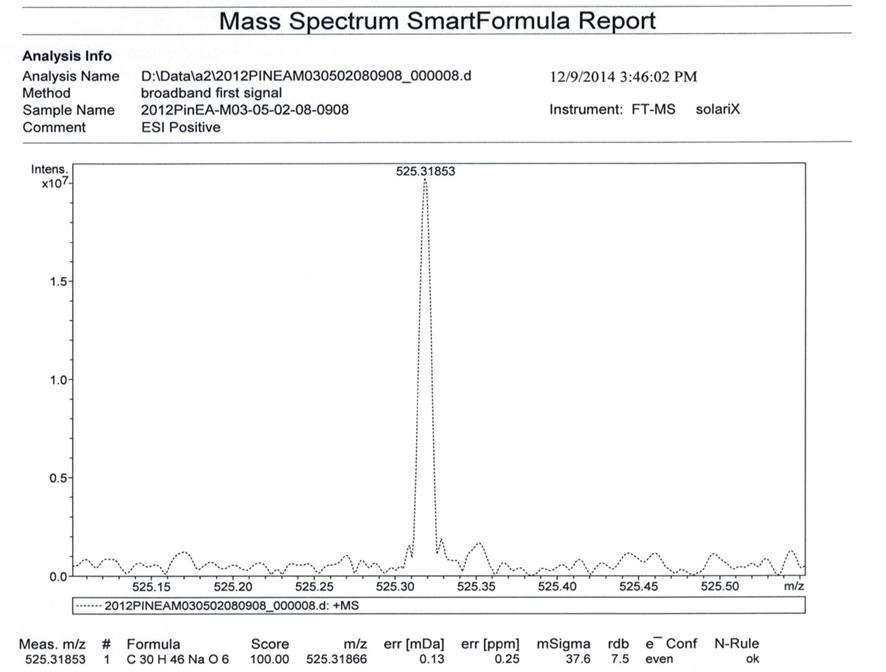


**Figure S1.** HRESIMS spectrum of compound **1.**


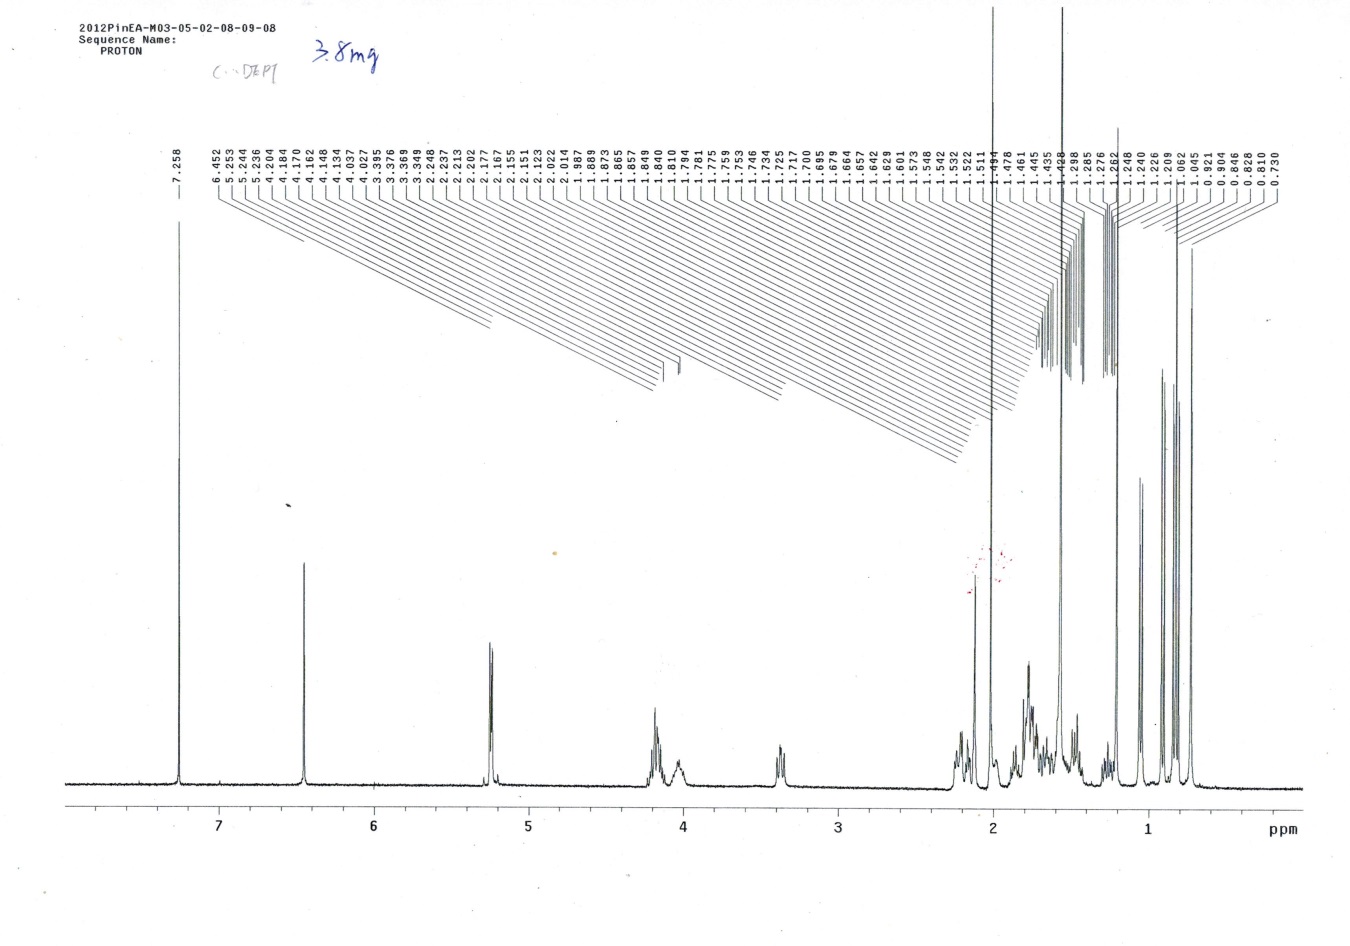


**Figure S2.** 1H NMR spectrum (400 MHz) of compound **1** in CDCl3.


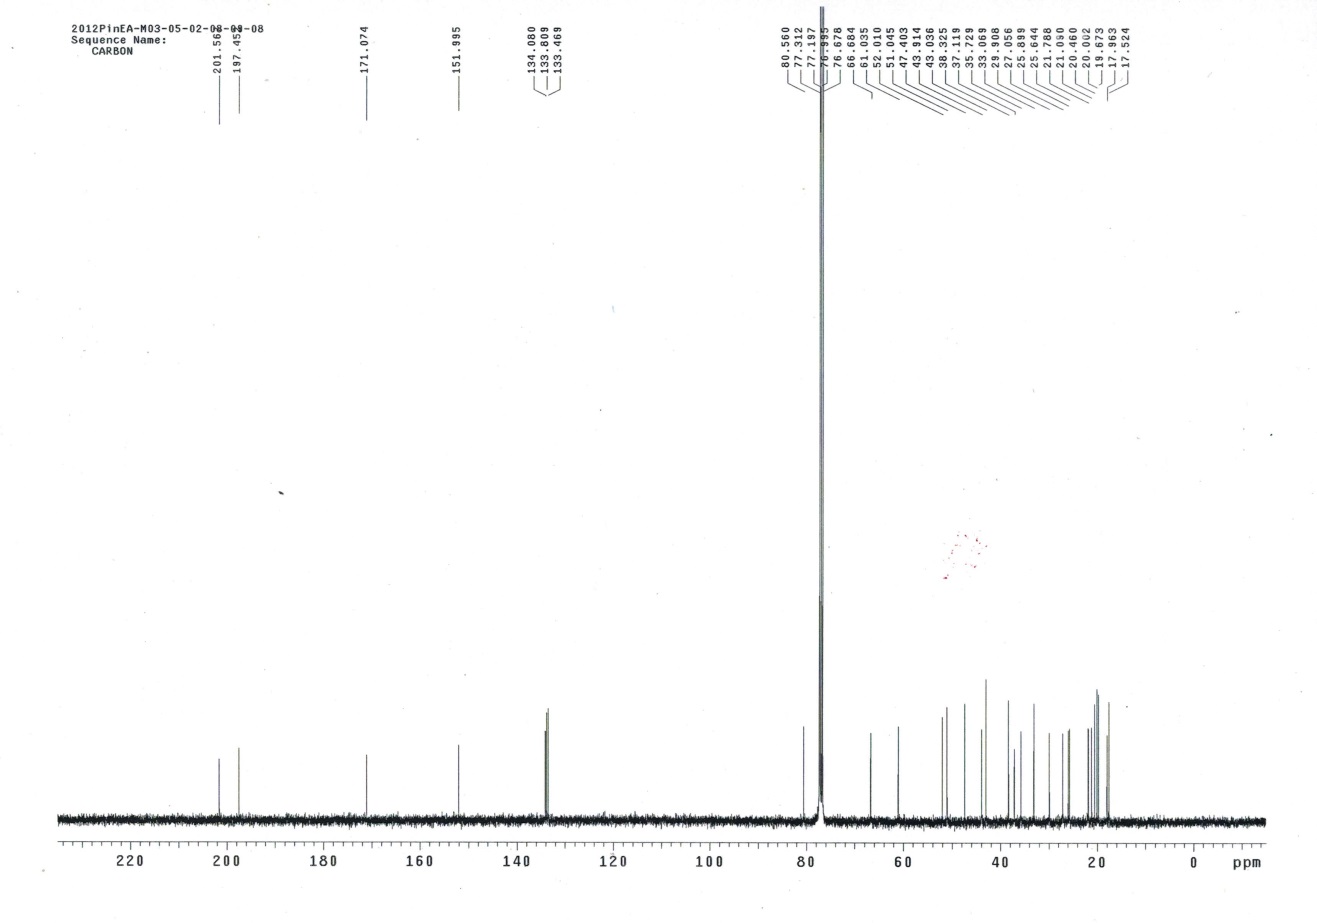


**Figure S3.** 13C NMR spectrum (100 MHz) of compound **1** in CDCl3.


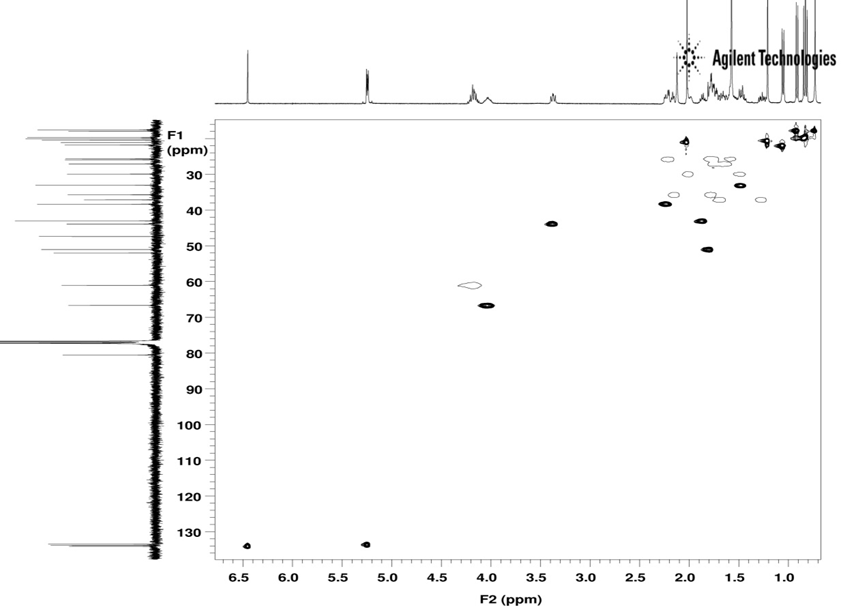


**Figure S4.** gHSQC spectrum (400 MHz) of compound **1** in CDCl3.


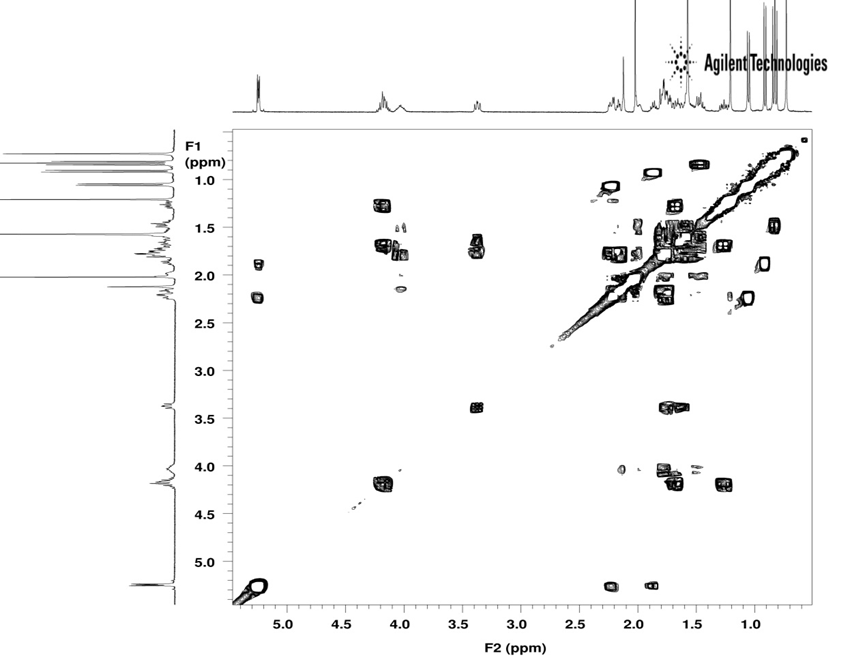


**Figure S5.** 1H−1H COSY spectrum (400 MHz) of compound **1** in CDCl3.


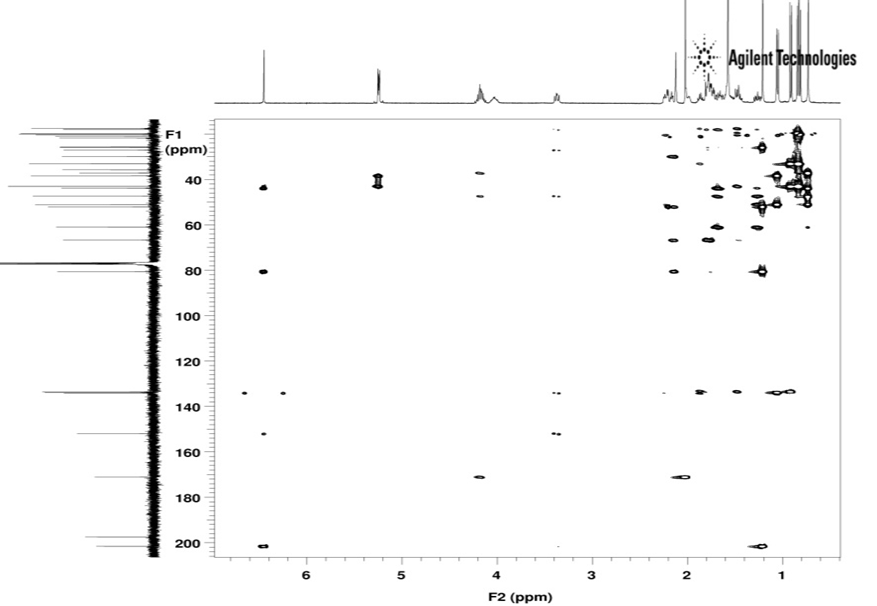


**Figure S6.** gHMBC spectrum (400 MHz) of compound **1** in CDCl3.


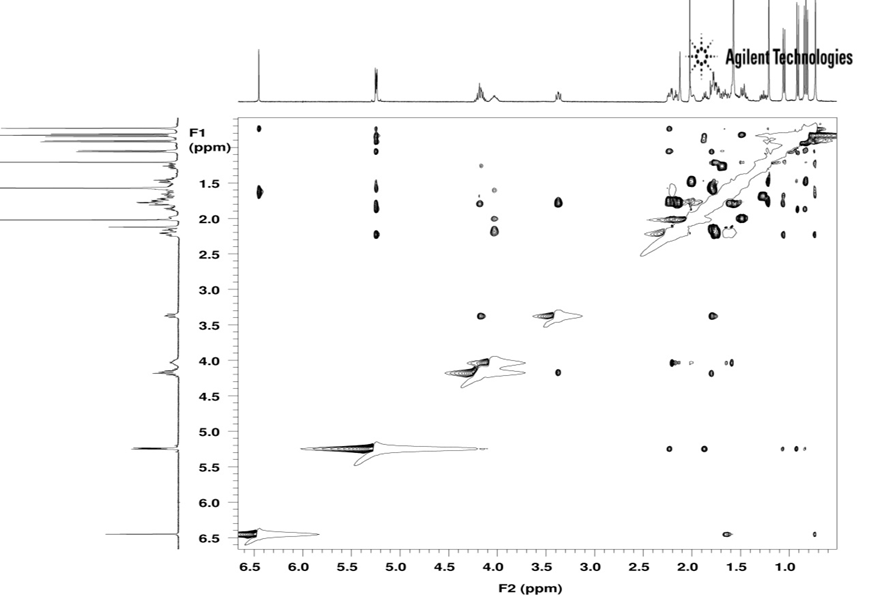


**Figure S7.** NOESY spectrum (400 MHz) of compound **1** in CDCl3.


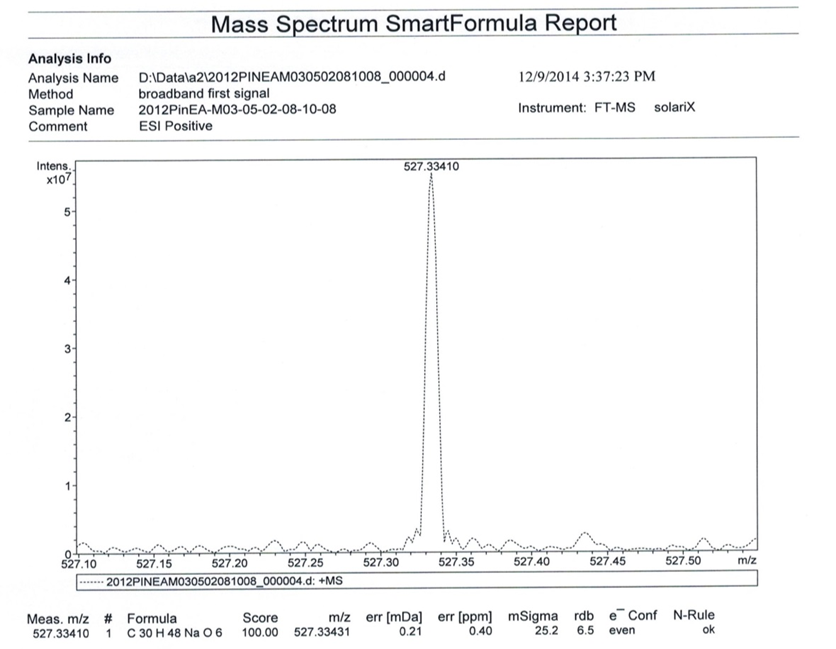


**Figure S8.** HRESIMS spectrum of compound **2**.


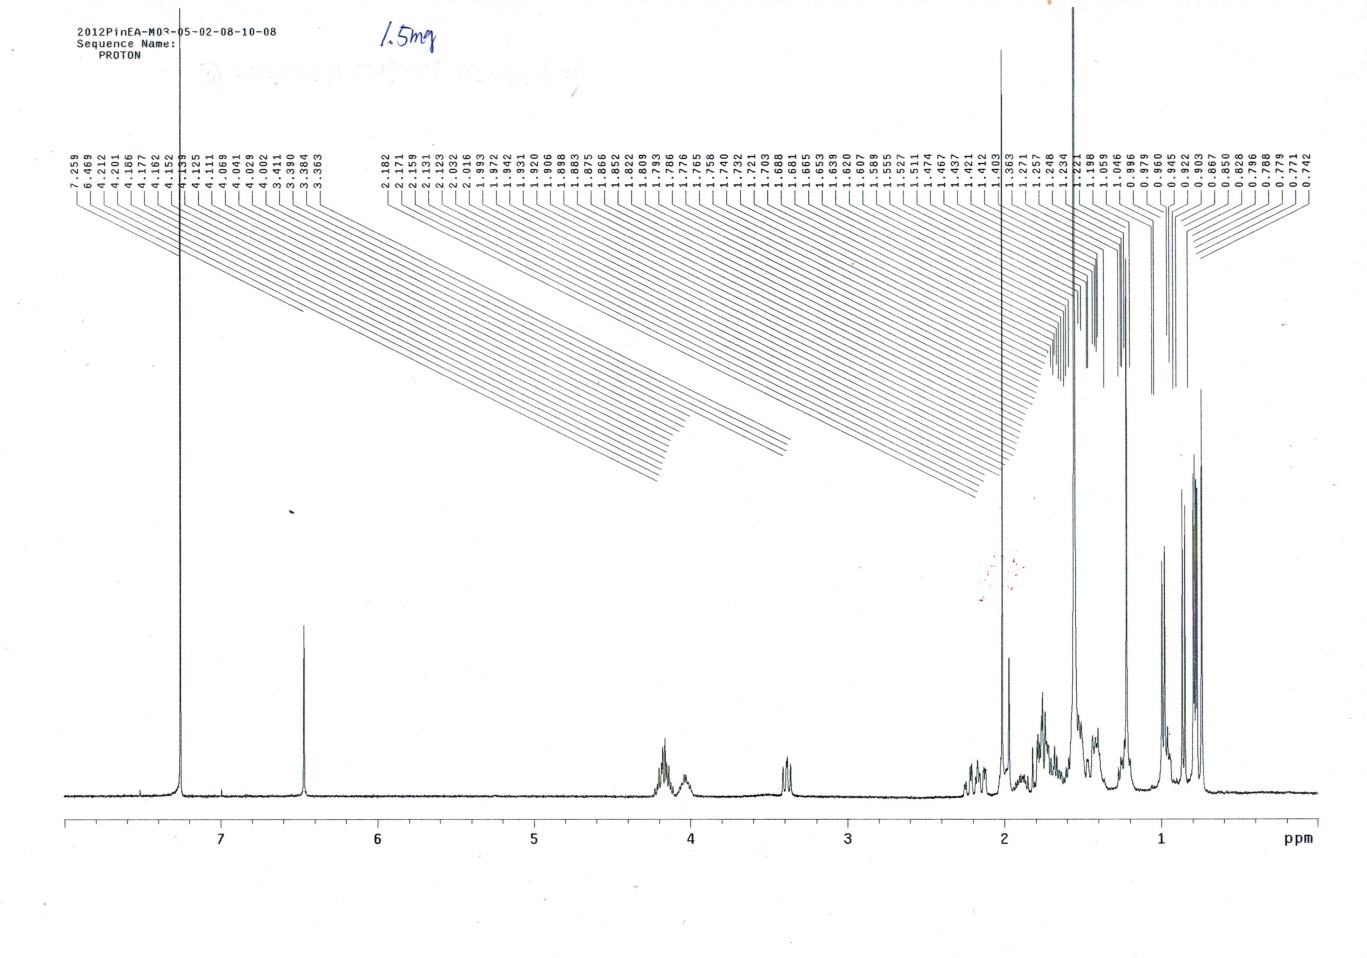


**Figure S9.** 1H NMR spectrum (400 MHz) of compound **2** in CDCl3.


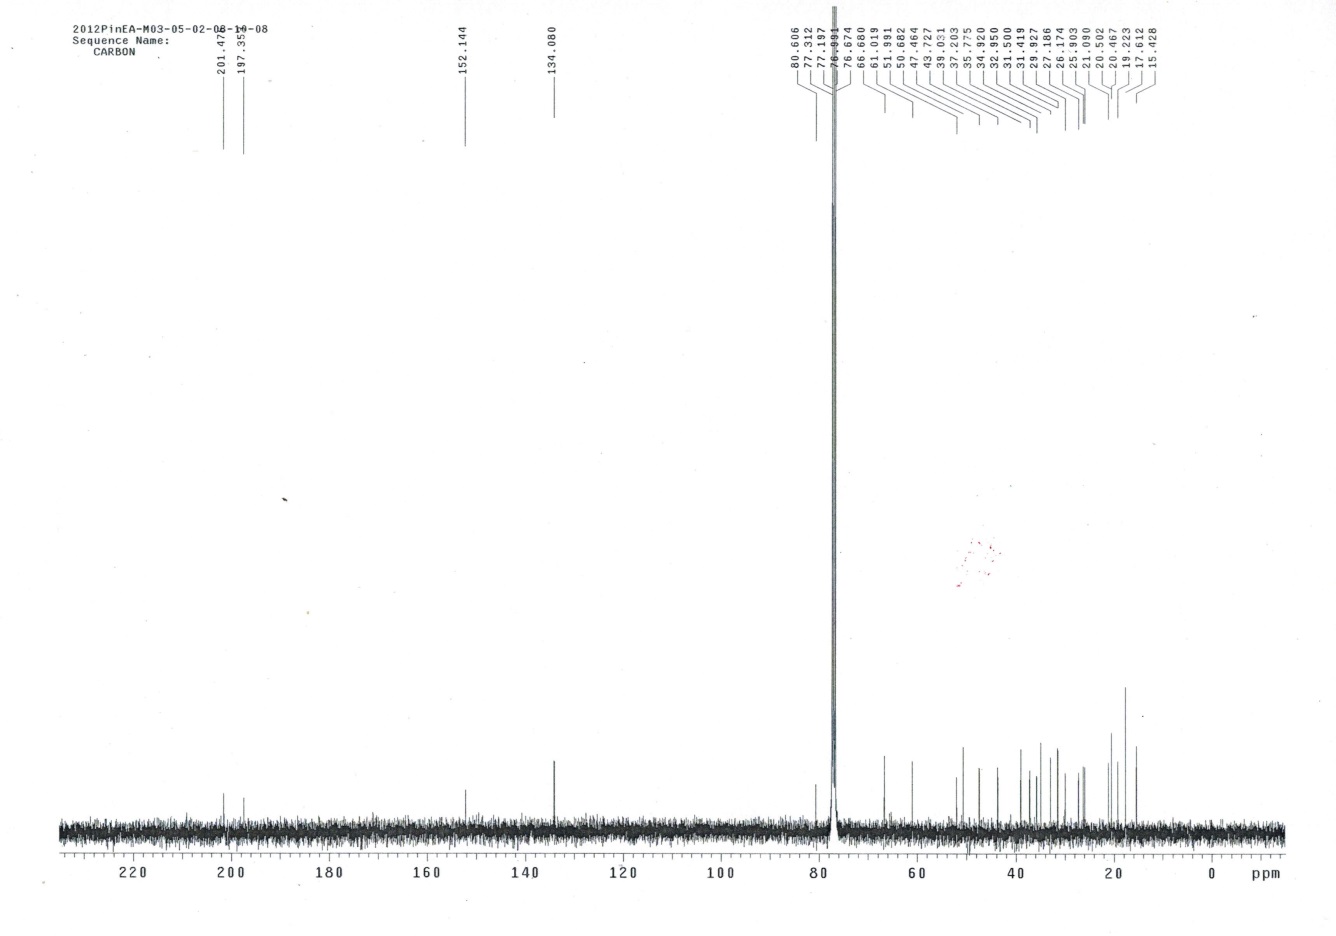


**Figure S10.** 13C NMR spectrum (100 MHz) of compound **2** in CDCl3.


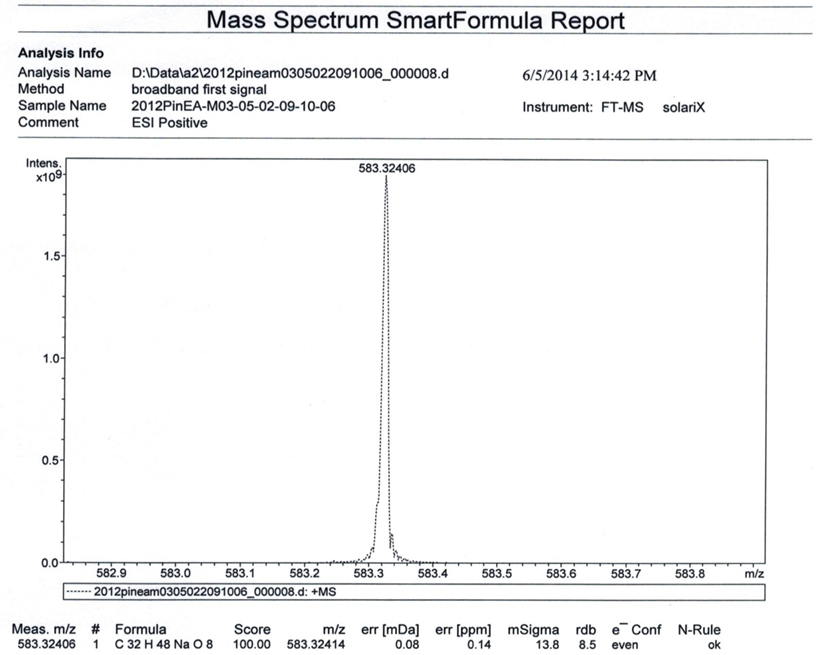


**Figure S11.** HRESIMS spectrum of compound **3**.


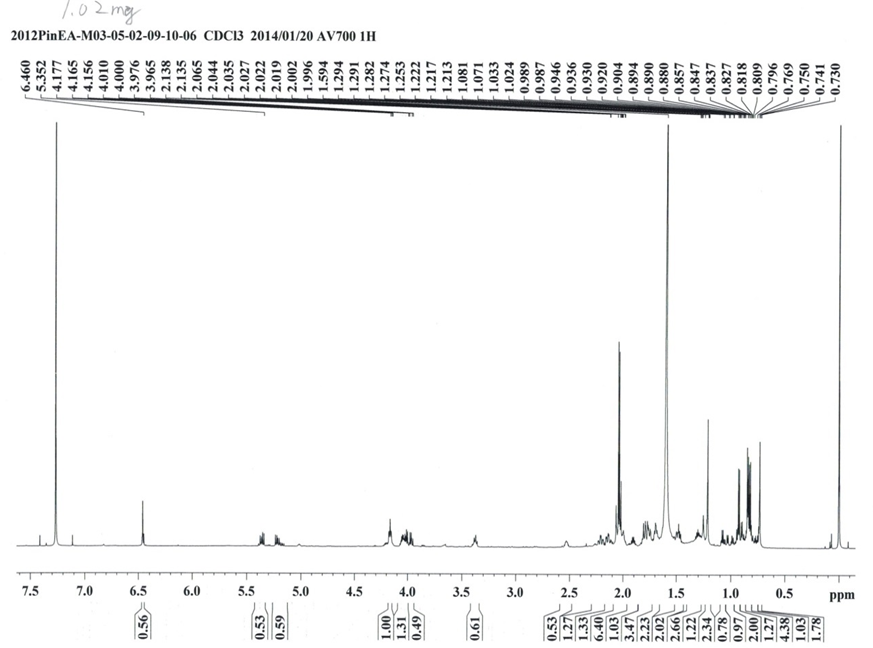


**Figure S12.** 1H NMR spectrum (700 MHz) of compound **3** in CDCl3.


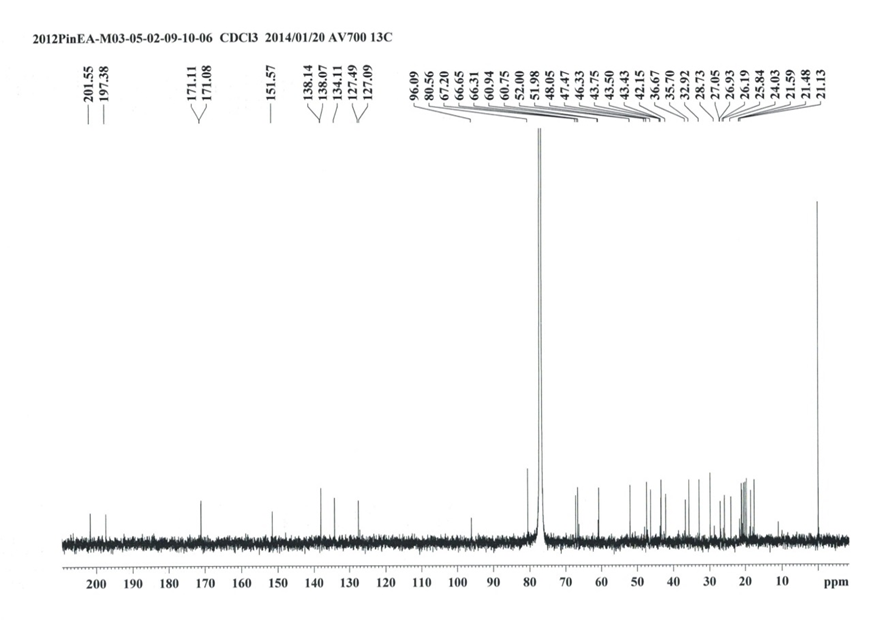


**Figure S13.** 13C NMR spectrum (175 MHz) of compound **3** in CDCl3.


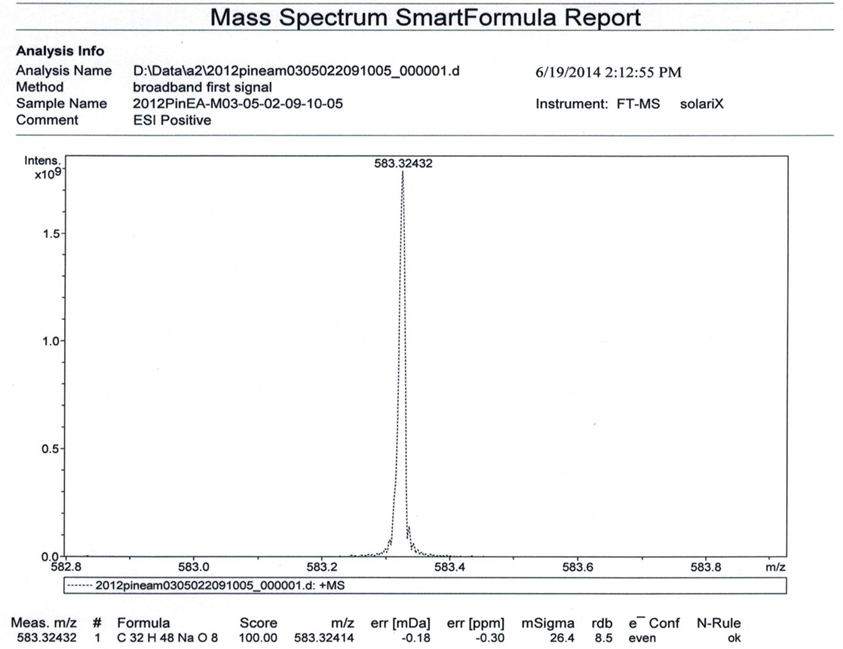


**Figure S14.** HRESIMS spectrum of compound **4**.


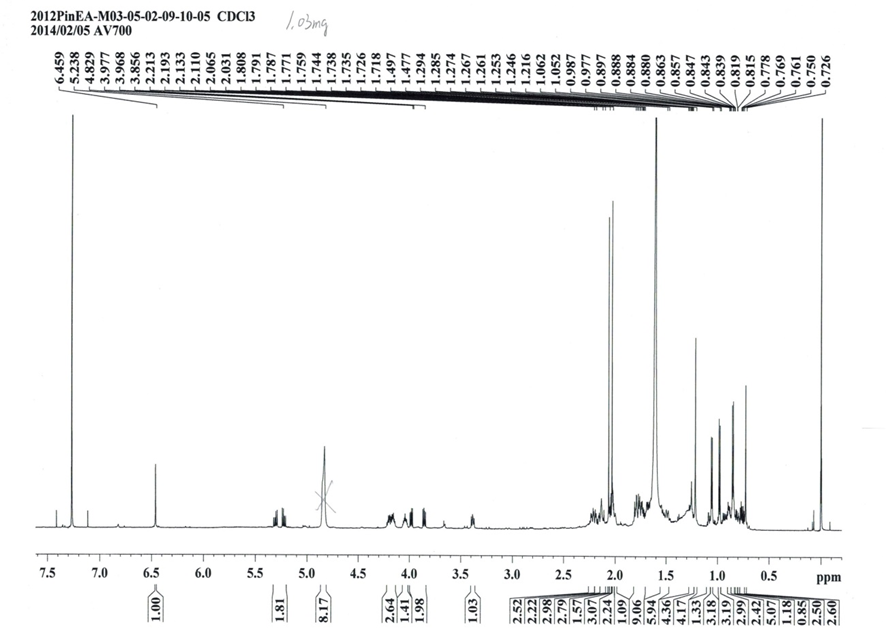


**Figure S15.** 1H NMR spectrum (700 MHz) of compound **4** in CDCl3.


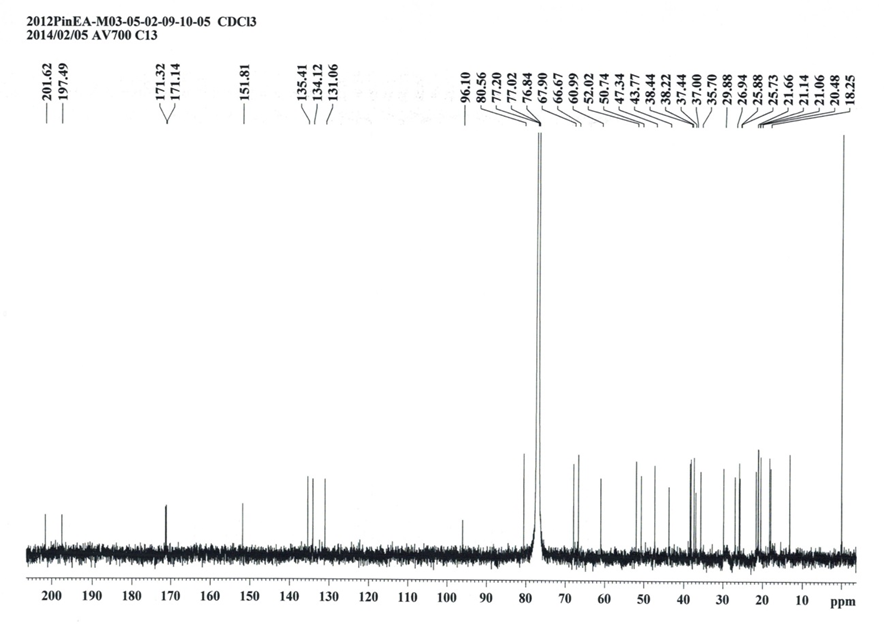


**Figure S16.** 13C NMR spectrum (175 MHz) of compound **4** in CDCl3.


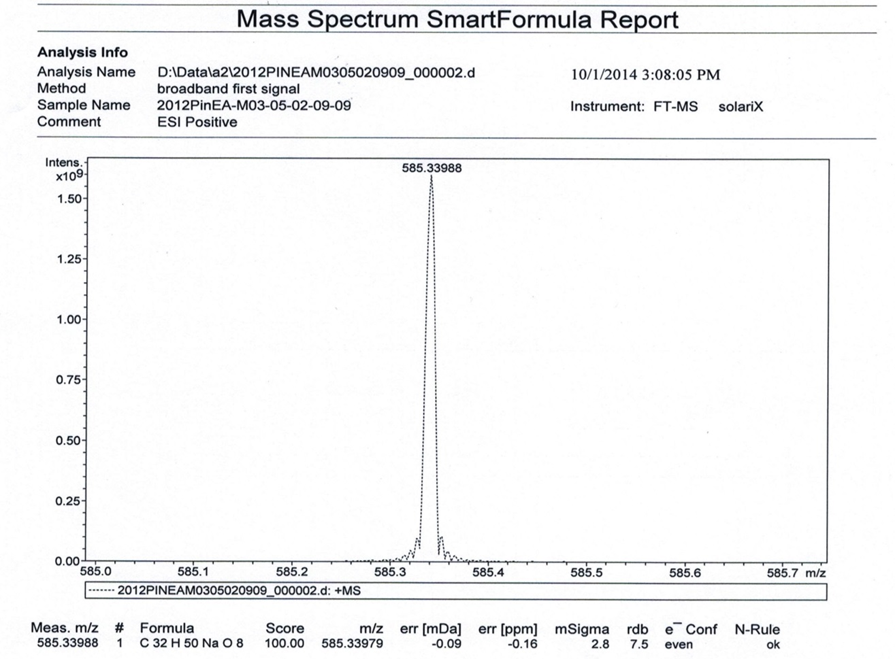


**Figure S17.** HRESIMS spectrum of compound **5**.


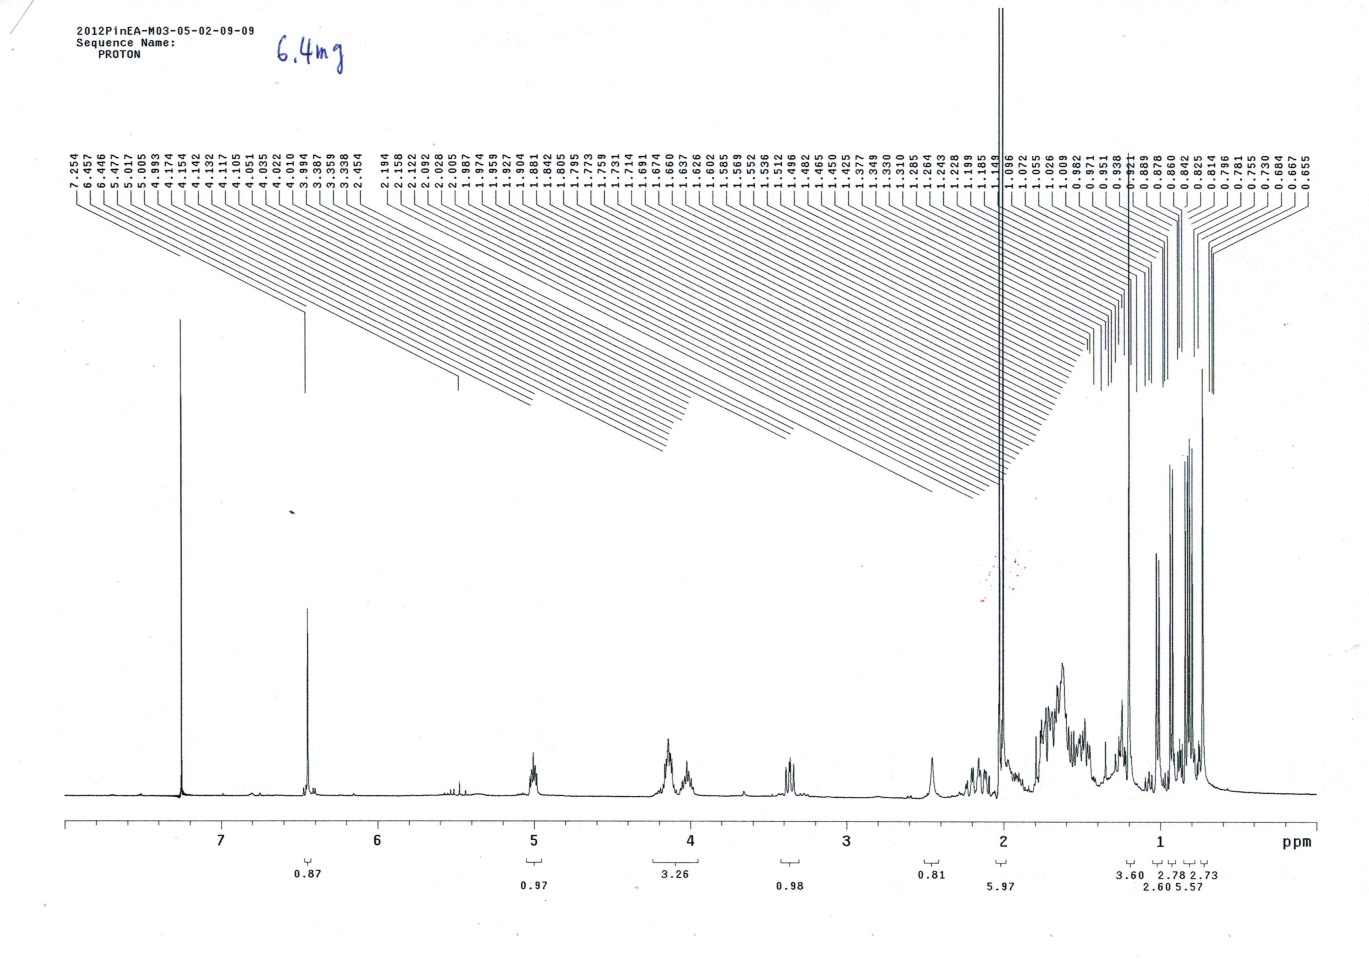


**Figure S18.** 1H NMR spectrum (400 MHz) of compound **5** in CDCl3.


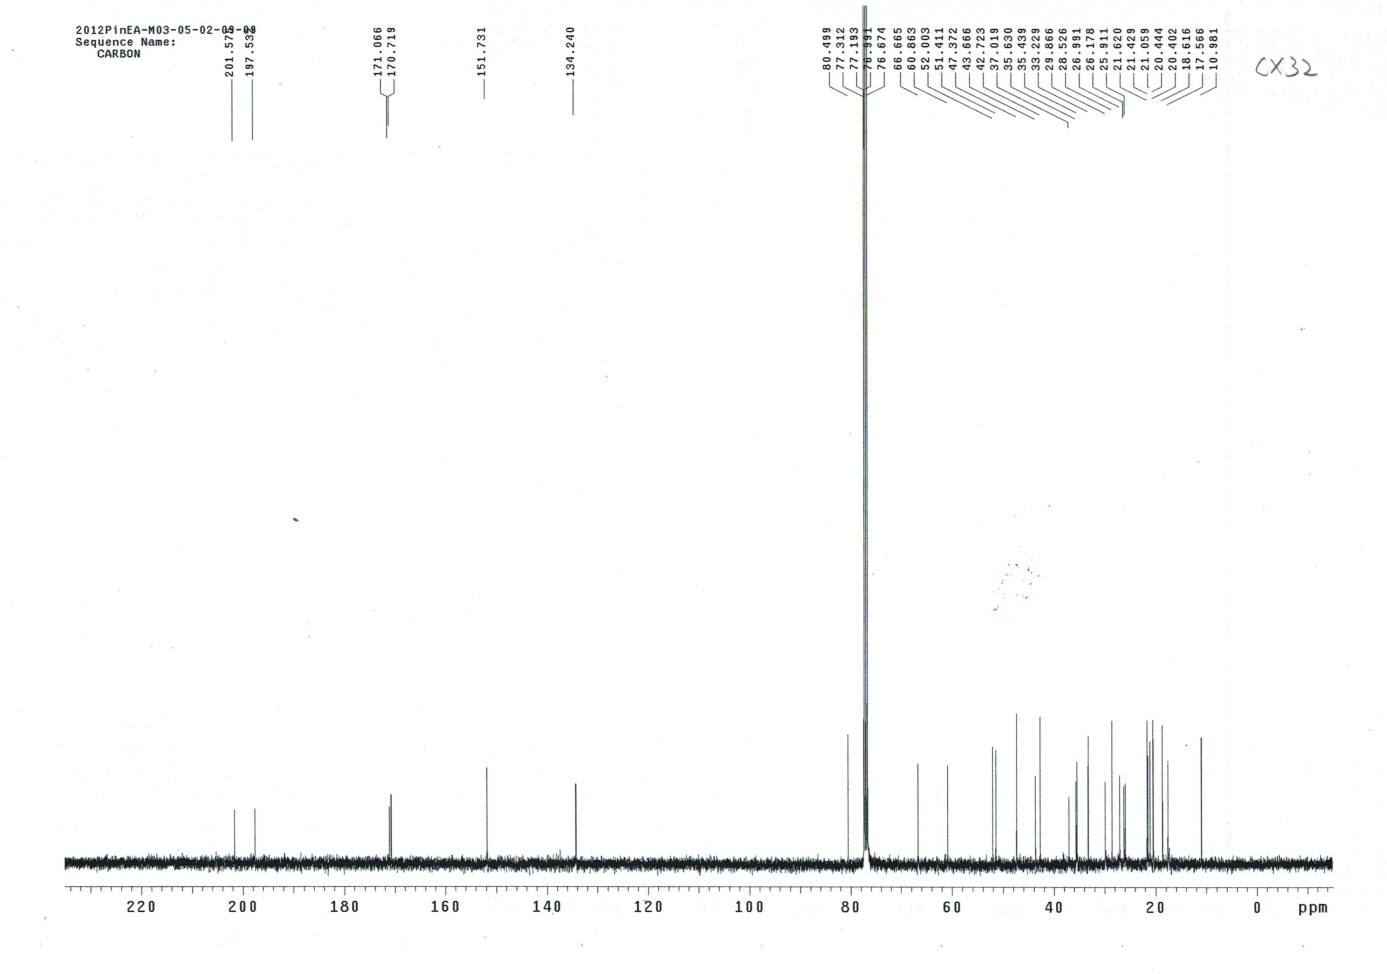


**Figure S19.** 13C NMR spectrum (100 MHz) of compound **5** in CDCl3.


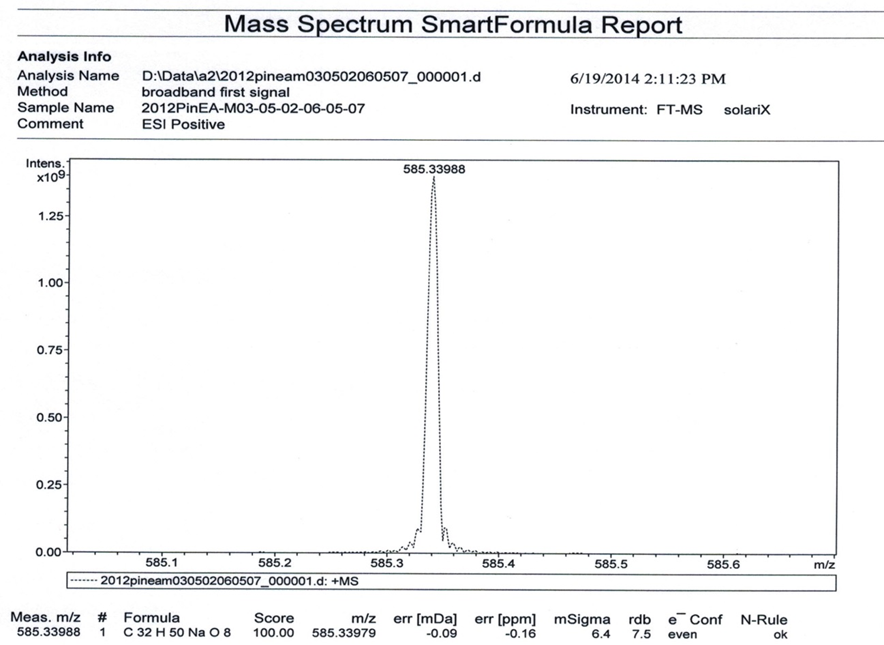


**Figure S20.** HRESIMS spectrum of compound **6**.


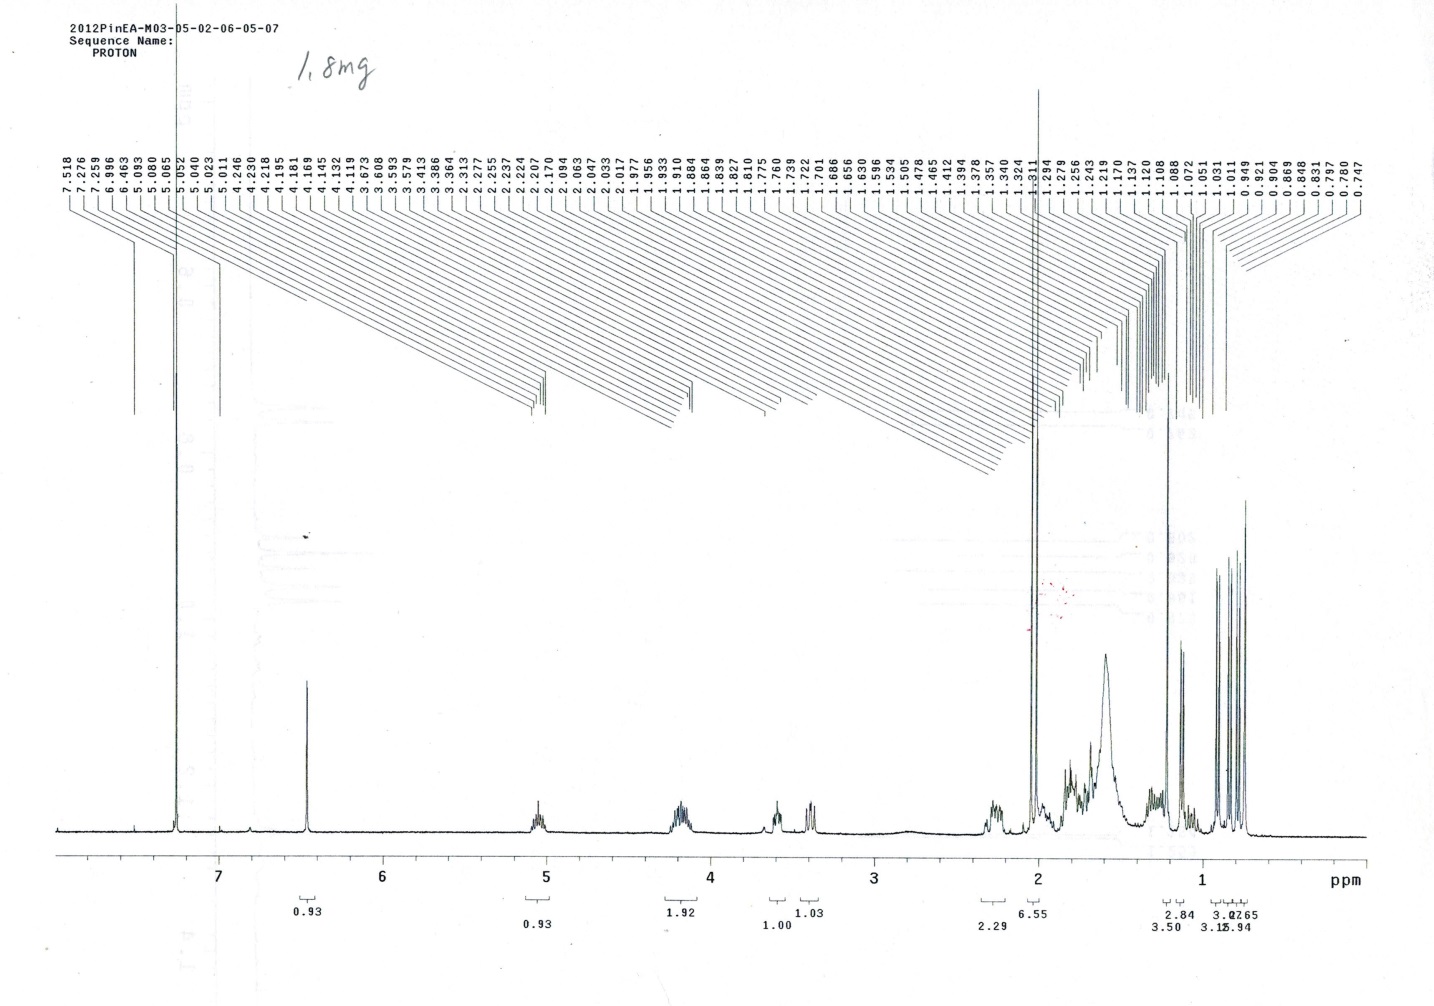


**Figure S21.** 1H NMR spectrum (400 MHz) of compound **6** in CDCl3.


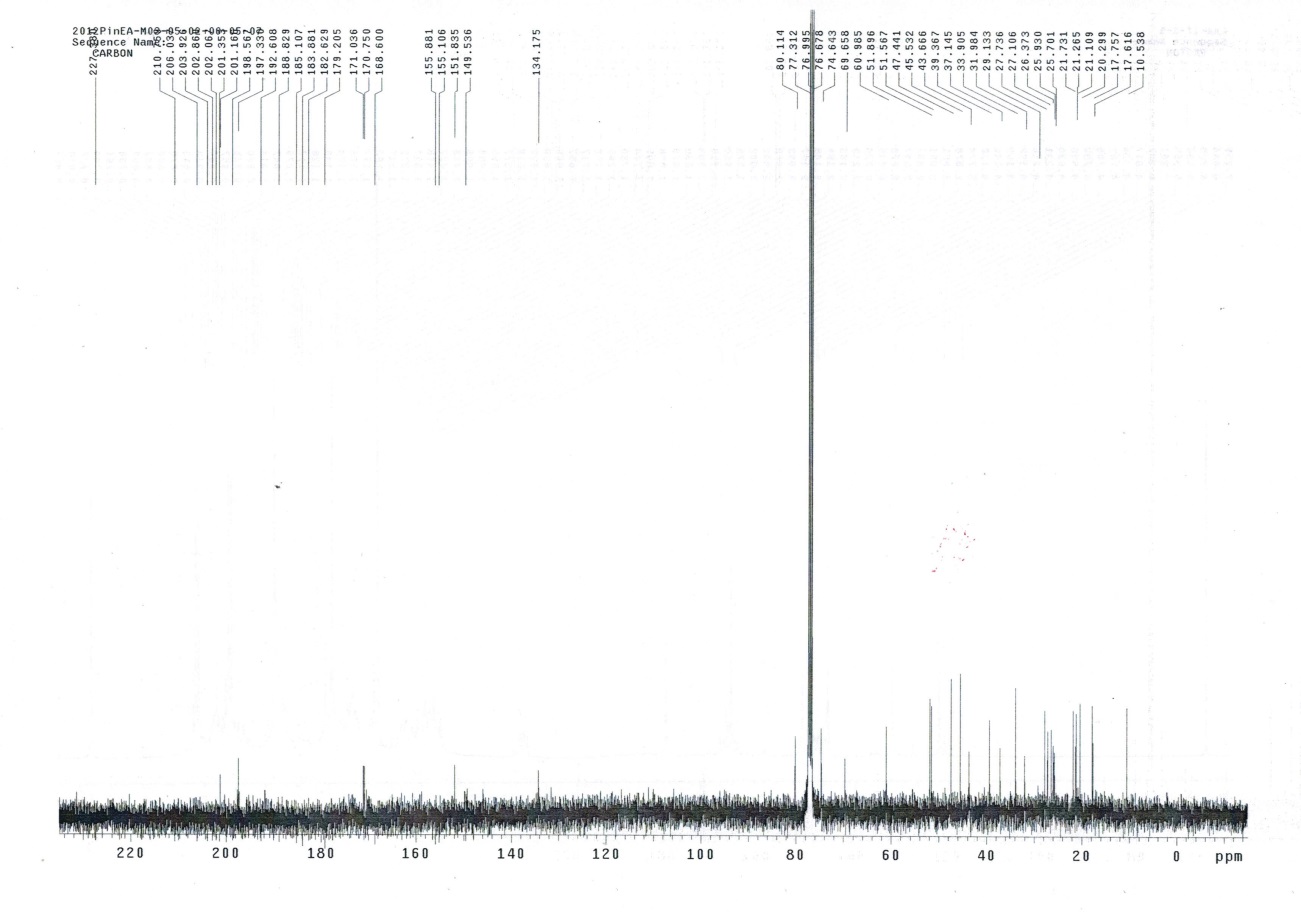


**Figure S22.** 13C NMR spectrum (100 MHz) of compound **6** in CDCl3.


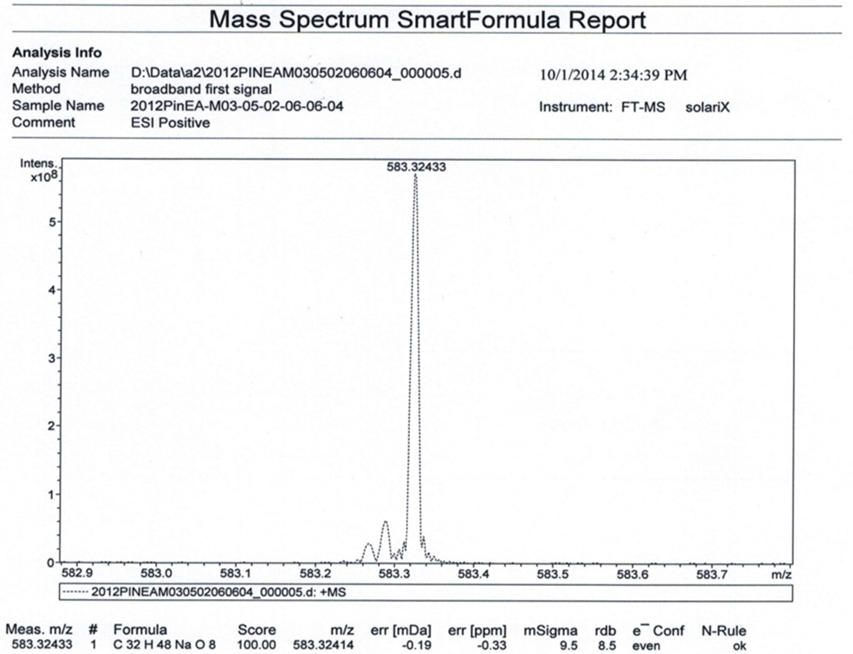


**Figure S23.** HRESIMS spectrum of compound **7**.


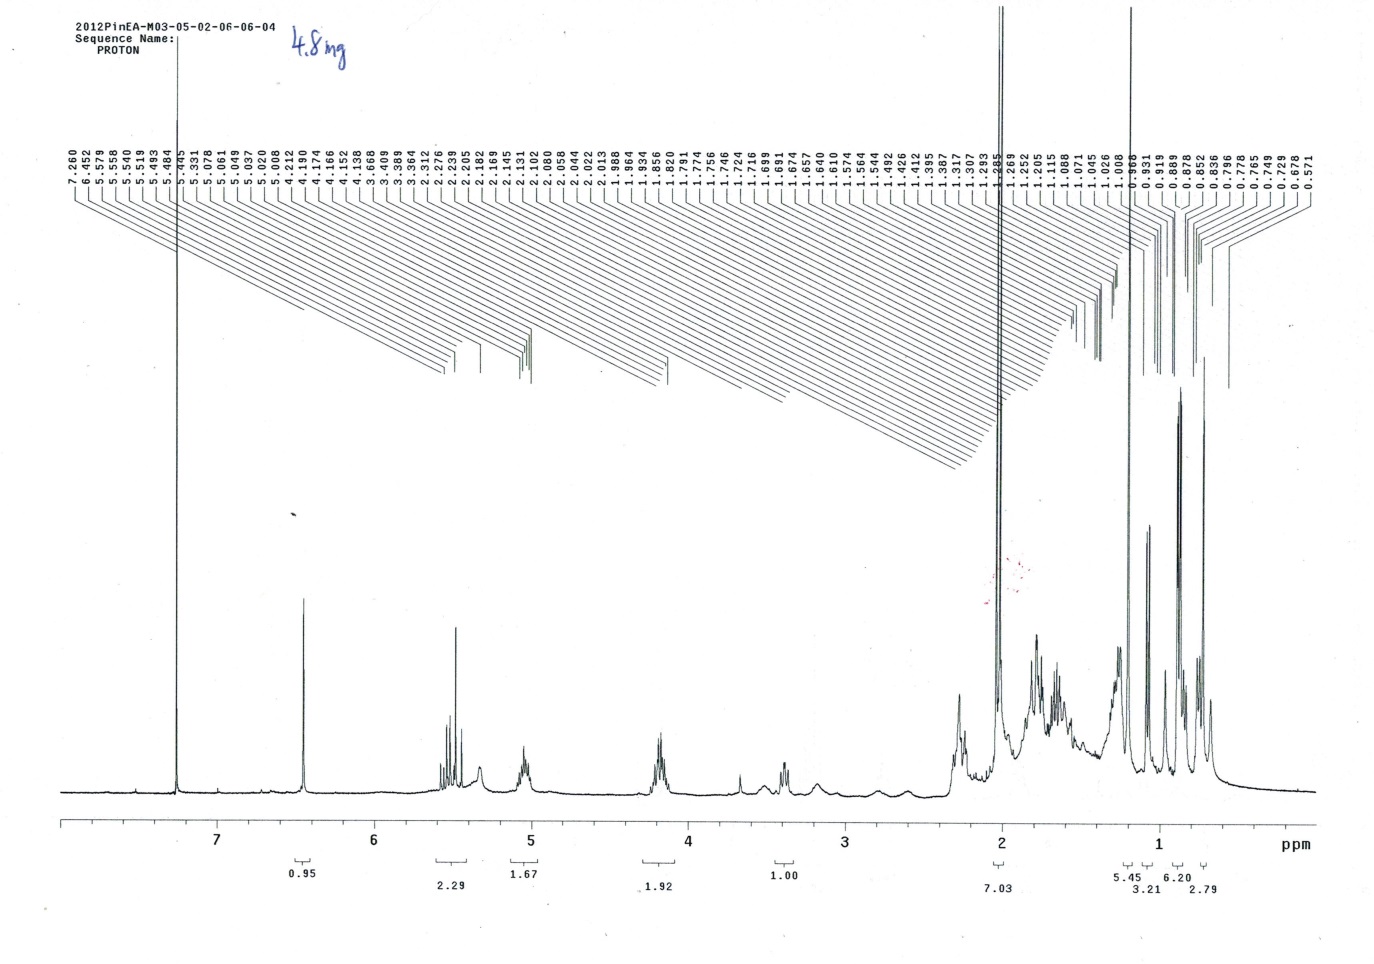


**Figure S24.** 1H NMR spectrum (400 MHz) of compound **7** in CDCl3.


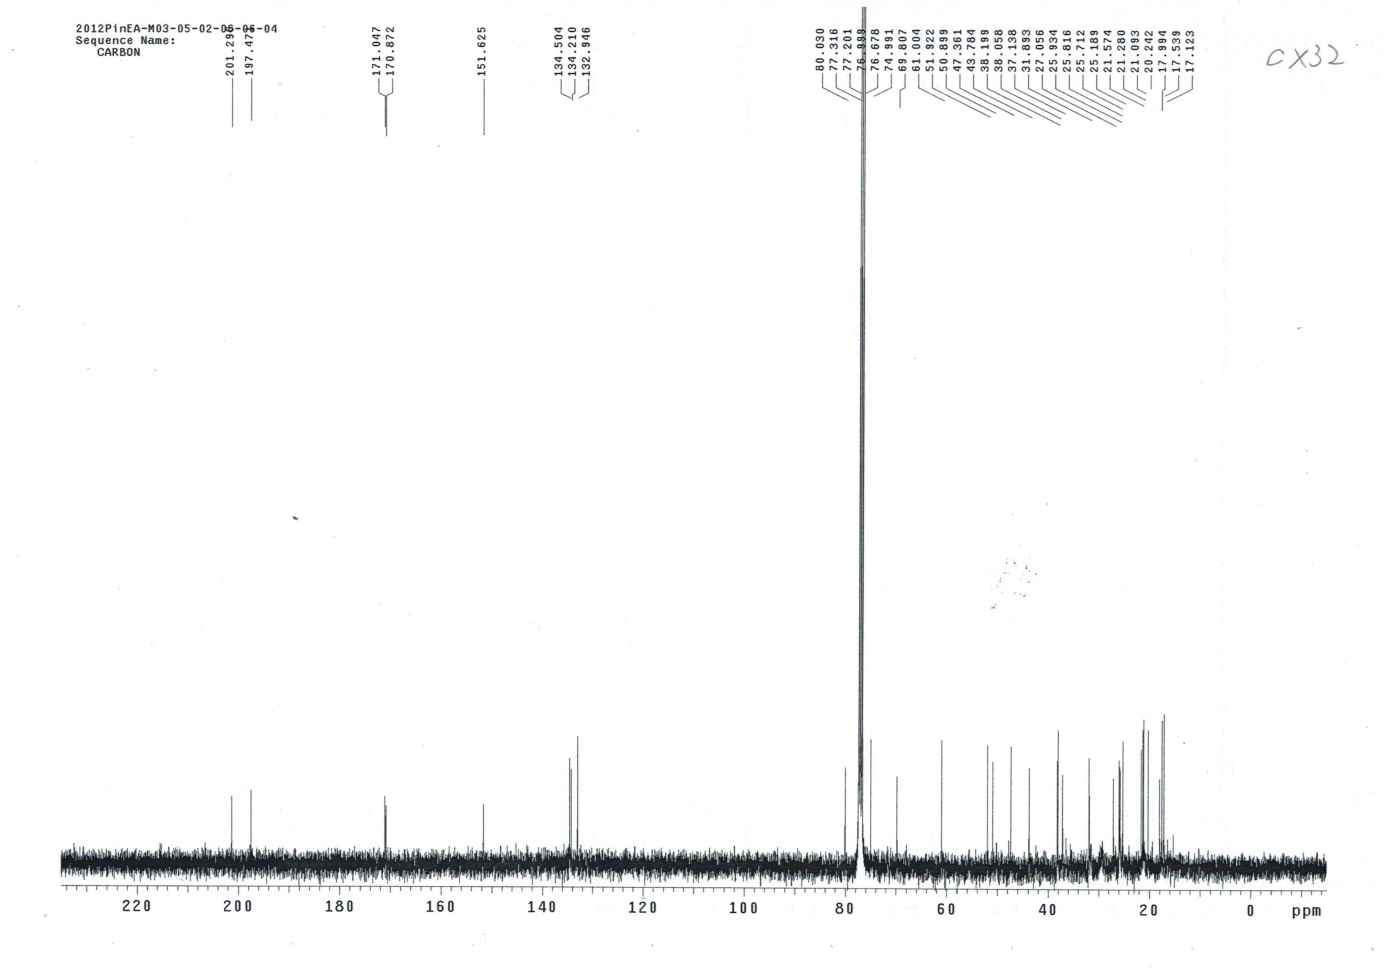


**Figure S25.** 13C NMR spectrum (100 MHz) of compound **7** in CDCl3.
